# Supplementary material for: IRS-2 Partially Compensates for the Insulin Signal Defects in IRS-1−/− Mice Mediated by miR-33
Source: PubMed Central journal article supplement — Mol Cells. 2017 Feb 13;40(2):123–32. doi: 10.14348/molcells.2017.2228 (PMC5339503; doi:10.14348/molcells.2017.2228), 2017-02-13
Supplement: molce-40-2-123-supple.pdf [file molce-40-2-123-supple.pdf]

## Supplementary data

Table S1. Microarray analysis of differentially expressed microRNAs in wild type and IRS-1<sup>-/-</sup> mice

| MicroRNA        | 2-fold change<br>(up-regulated) | MicroRNA          | 2-fold change<br>(down-regulated) |
|-----------------|---------------------------------|-------------------|-----------------------------------|
| mmu-miR-296-3p  | 29.27926                        | mmu-miR-143       | 0.015678                          |
| mmu-miR-3095-3p | 24.07117                        | mmu-miR-511-3p    | 0.017776                          |
| mmu-miR-711     | 18.04219                        | mmu-miR-425       | 0.058212                          |
| mmu-miR-193b    | 17.9734                         | mmu-miR-148b      | 0.062801                          |
| mmu-miR-365     | 16.05411                        | mmu-miR-125a-5p   | 0.100553                          |
| mmu-miR-2137    | 8.807258                        | mmu-miR-34b-3p    | 0.106321                          |
| mmu-miR-882     | 8.024502                        | mmu-miR-32        | 0.130723                          |
| mmu-miR-744     | 7.45399                         | mmu-miR-125b-5p   | 0.137221                          |
| mmu-miR-291b-5p | 7.272188                        | mmu-miR-1839-3p   | 0.15878                           |
| mmu-miR-1900    | 6.746615                        | mmu-miR-669m-3p   | 0.166535                          |
| mmu-miR-1949    | 6.469205                        | <b>mmu-miR-33</b> | <b>0.177672</b>                   |
| mmu-miR-1892    | 6.351003                        | mmu-miR-342-3p    | 0.208169                          |
| mmu-miR-877     | 5.923232                        | mmu-miR-503       | 0.240889                          |
| mmu-miR-290-5p  | 5.423355                        | mmu-miR-29c       | 0.243544                          |
| mmu-miR-193     | 5.139421                        | mmu-miR-142-5p    | 0.244269                          |
| mghev-miR-M1-8  | 4.844797                        | mmu-miR-3068      | 0.261313                          |
| mmu-miR-291a-5p | 4.188771                        | mmu-miR-574-5p    | 0.266805                          |
| mmu-miR-710     | 4.077128                        | mmu-miR-500       | 0.275799                          |
| mmu-miR-294     | 3.98219                         | mmu-miR-222       | 0.287481                          |
| mmu-miR-107     | 3.812681                        | mmu-miR-17        | 0.322588                          |
| mmu-miR-351     | 3.33625                         | mmu-miR-350       | 0.328491                          |
| mmu-miR-300     | 3.028173                        | mmu-miR-101a      | 0.332314                          |
| mmu-miR-29a     | 2.990734                        | mmu-miR-361       | 0.332903                          |
| mmu-miR-181a    | 2.864238                        | mmu-let-7g        | 0.341528                          |
| mmu-miR-3096-5p | 2.84753                         | mmu-miR-30e       | 0.350587                          |
| mmu-miR-204     | 2.844823                        | mmu-miR-98        | 0.351965                          |
| mmu-miR-15b     | 2.505462                        | mmu-miR-301a      | 0.380265                          |
| mmu-let-7e      | 2.492818                        | mmu-miR-101b      | 0.403142                          |
| mmu-miR-1947    | 2.486206                        | mmu-miR-326       | 0.404033                          |
| mmu-miR-883a-5p | 2.331398                        | mmu-miR-705       | 0.421695                          |
| mmu-miR-24-2    | 2.253561                        | mmu-miR-19a       | 0.430661                          |
| mmu-miR-1897-5p | 2.143322                        | mmu-miR-93        | 0.434755                          |
| mmu-miR-665     | 2.128158                        | mmu-let-7i        | 0.436403                          |
| mmu-miR-223     | 2.031092                        | mmu-miR-24-1      | 0.443501                          |
|                 |                                 | mmu-miR-142-3p    | 0.450311                          |
|                 |                                 | mmu-miR-7a        | 0.451565                          |
|                 |                                 | mmu-miR-652       | 0.453026                          |
|                 |                                 | mmu-miR-26b       | 0.453815                          |

|                 |          |
|-----------------|----------|
| mmu-miR-27b     | 0.455711 |
| mmu-miR-340-5p  | 0.461645 |
| mmu-miR-191     | 0.462092 |
| mmu-miR-3069-3p | 0.46966  |
| mmu-miR-669o-5p | 0.478829 |
| mmu-miR-466f-3p | 0.486755 |
| mmu-miR-27a     | 0.493632 |

---
